# Supplementary material for: UNC-45 has a crucial role in maintaining muscle sarcomeres during aging in Caenorhabditis elegans
Source: bioRxiv or medRxiv preprint supplement (doi:10.1101/2022.06.04.494828), 2022-06-04
Supplement: Supplementary file [file media-1.pdf]

## Supplemental

Table S1. Primers

| gene           | Forward primer                | Reverse primer             |
|----------------|-------------------------------|----------------------------|
| <i>gapdh-2</i> | 5' ACTCTTCACGATTGTCGCTTAGT 3' | 5' AACCCACATACGGACGGTTG 3' |
| <i>ges-1</i>   | 5' GCTAAAACCGGAGTTCCCCAA 3'   | 5' CGTTCCAGAAAGCGAGAGGT 3' |
| <i>hsp-90</i>  | 5' ATTCGCTACCAGGCACTCAC 3'    | 5' GACAAGATCGGCCTTGGTCA 3' |
| <i>unc-45</i>  | 5' TGCTGAAGGTGGAACGGTTT 3'    | 5' CGTATGCTCGTTGTCCAGGG 3' |
| <i>unc-54</i>  | 5' ATCCAAGCCATTTCATGCCGA 3'   | 5' GGTCACGTGCTGAGAGTGT 3'  |
| <i>myo-3</i>   | 5' TCCAGAAGATGGATTTCGTCGC 3'  | 5' GCGGGTTCATCTCTTGGCAT 3' |

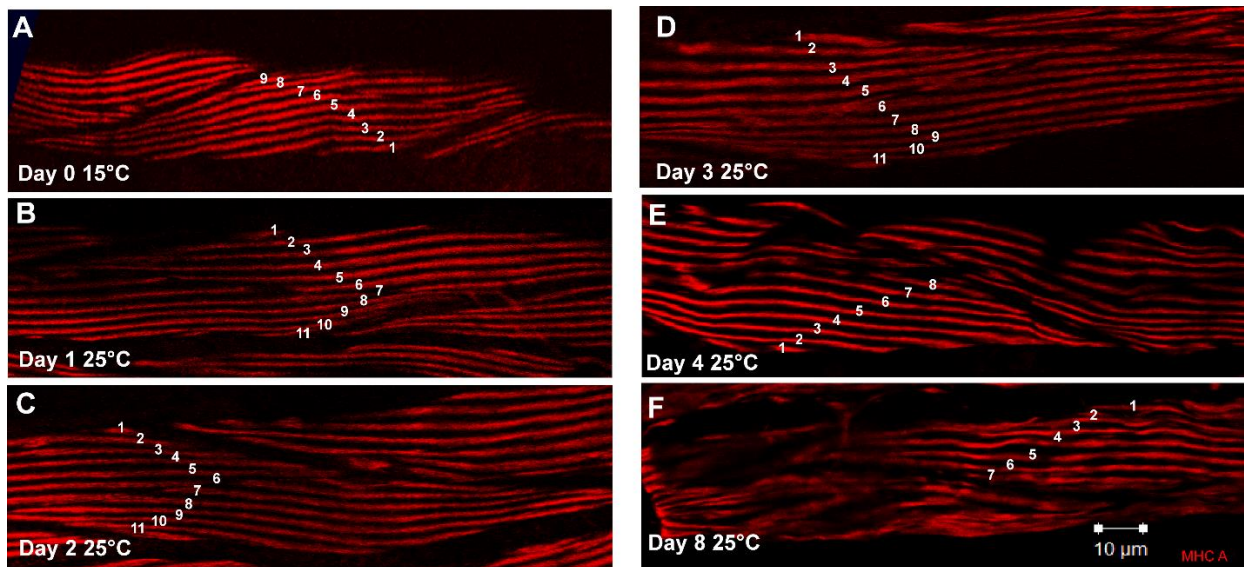

**Figure S1. *unc-45(e286)* representative images of MHC A immunostaining to count A-bands as an assessment of assembled thick filament quantity.** A-F) are representative images of body wall muscle near the vulva immunostained with anti-MHC A at different ages of adulthood (day 0, 1, 2, 3, 4, 8) and grown at either 15°C (A) or 25°C (B-F) with an A-band count depicted as white numbers along the A-bands.

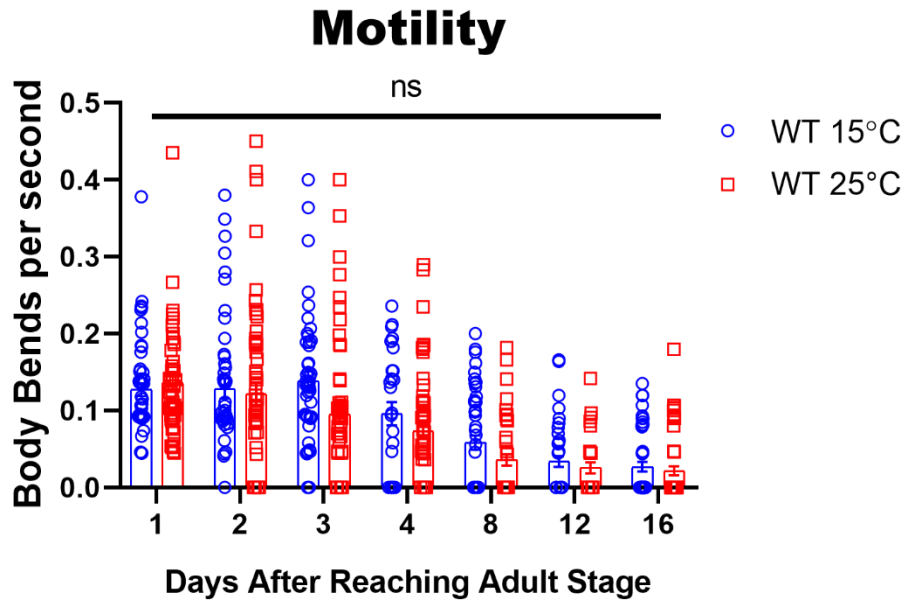

**Figure S2. Crawling motility does not change significantly when wildtype worms are grown at 15°C vs. 25°C.** Quantification of agar crawling motility assays at different ages of adulthood and grown at either 15°C or 25°C measured in body bends per second.

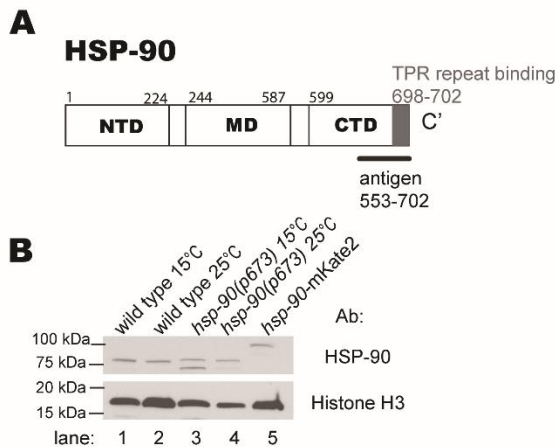

**Figure S3. HSP-90 Antibody validation.** A) shows the protein domains of HSP-90 and the epitope that was used as an antigen when creating the antibody. B) shows a Western Blot validating the antibody that was produced. shows HSP-90 loss of function temperature sensitive mutants (lanes 3-4) compared to wild type (lanes 1-2) to show that the mutants have altered HSP-90 and one CRISPR generated fluorescently tagged (mKate2) HSP-90 strain (lane 5) compared to wild type (lanes 1-2) to show that the antibody recognizes one protein band of the appropriate size (106.3 and 80.3 kDa respectively).

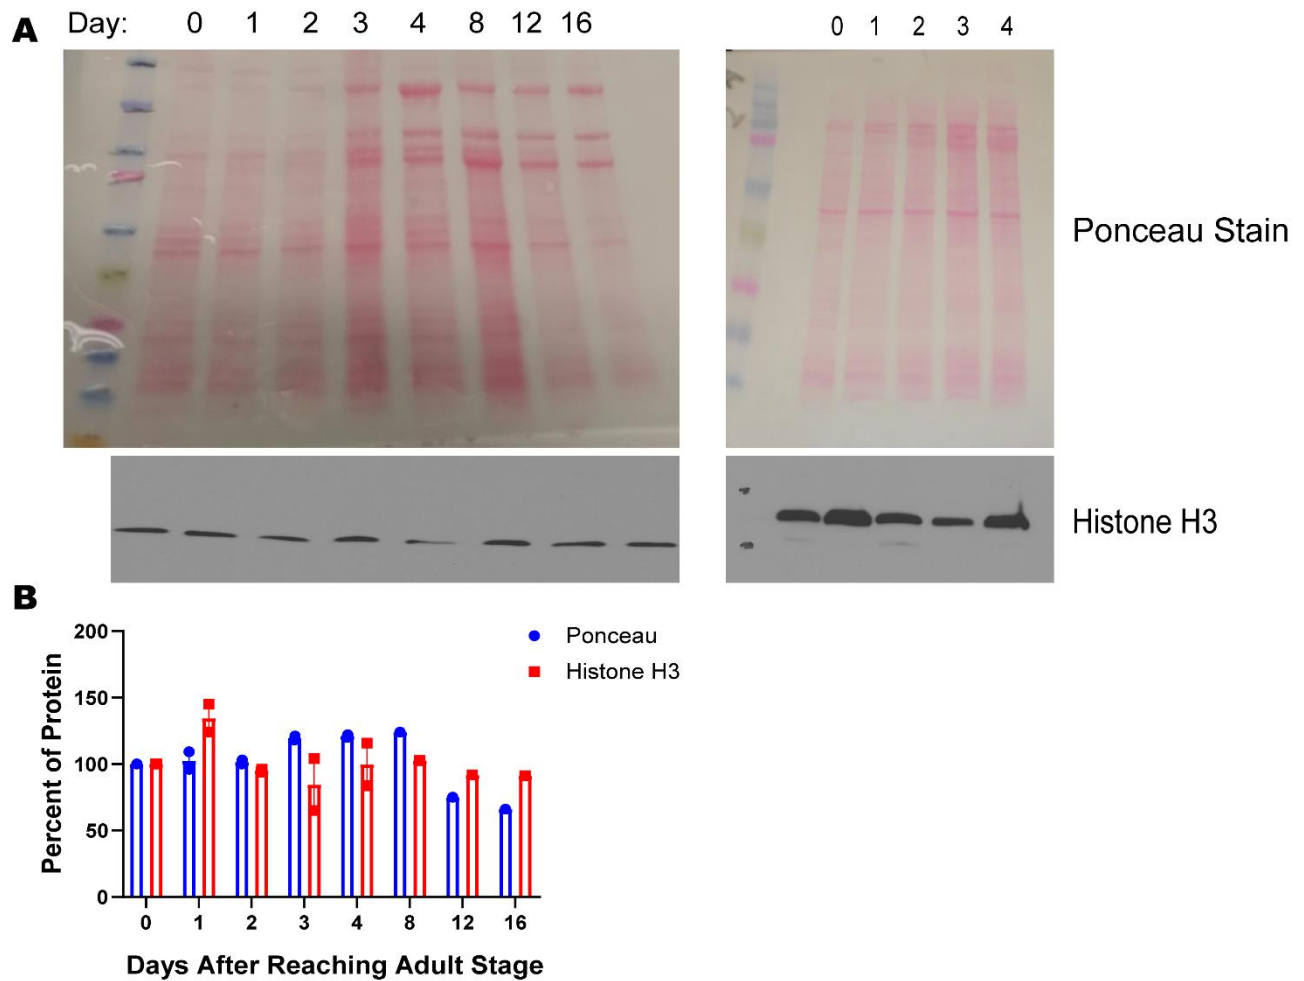

**Figure S4. Histone H3 compared to Ponceau S staining.** A) depicts Ponceau S staining above the Histone H3 from the same blot. B) depicts quantification of Ponceau S staining levels compared to Histone H3 levels at different ages. Fiji Image J was used to measure protein levels.

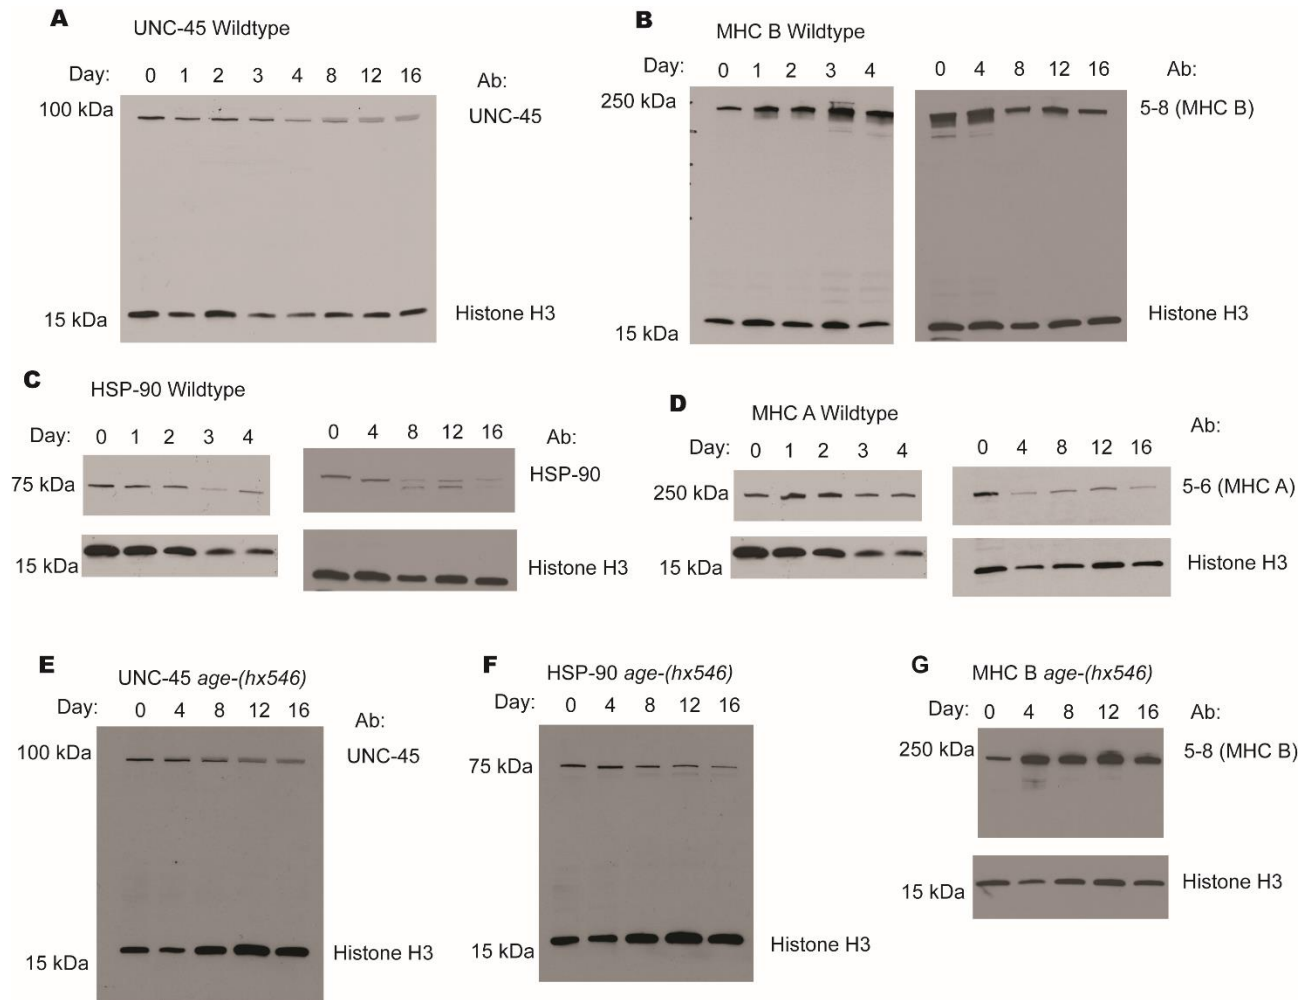

**Figure S5. Representative Western Blot images from wildtype and *age-1(hx546)*.** A-D) depict representative images of UNC-45 (A), MHC B (B), HSP-90 (C), and MHC A (D) Western Blots from wildtype worms at different ages. E-G) depict representative images of UNC-45 (E), HSP-90 (F), and MHC B (G) from *age-1(hx546)* worms at different ages. The load control Histone H3 is also shown for each blot. When blots are shown as two images instead of one, it is because a different exposure time was needed for the two different proteins on the blot.

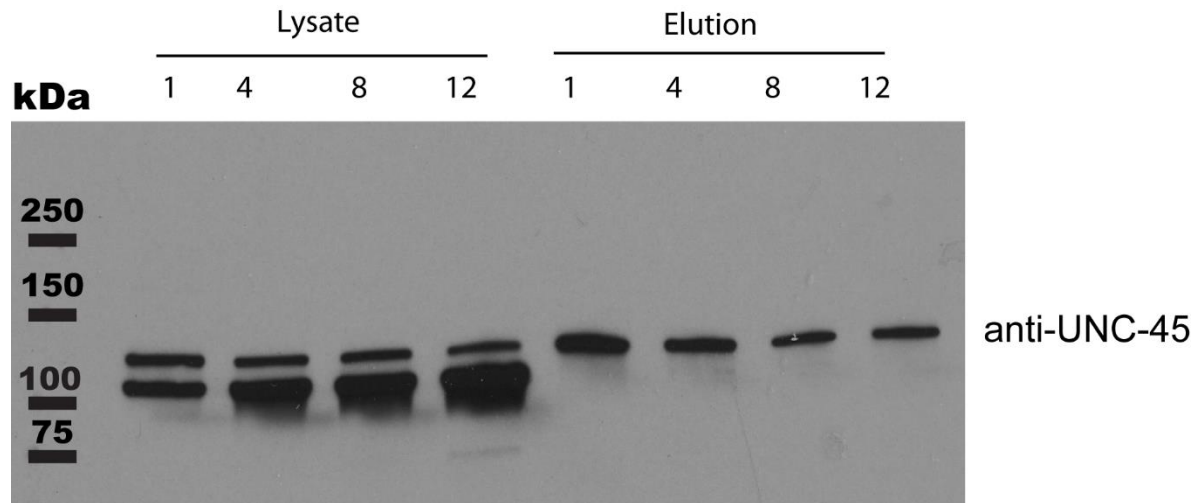

**Figure S6. mNeonGreen Immunoprecipitation.** Part of the protein lysate (~1%) of each sample used for the immunoprecipitation (right side of blot) and part of the total elution (~12.5%) from each immunoprecipitation (left side of blot) were run on a 4-20% SDS-PAGE gel, transferred to nitrocellulose, and reacted with the UNC-45 antibody to ensure that UNC-45::mNeonGreen was pulled down with the pre-conjugated mNeonGreen nanobodies magnetic beads.

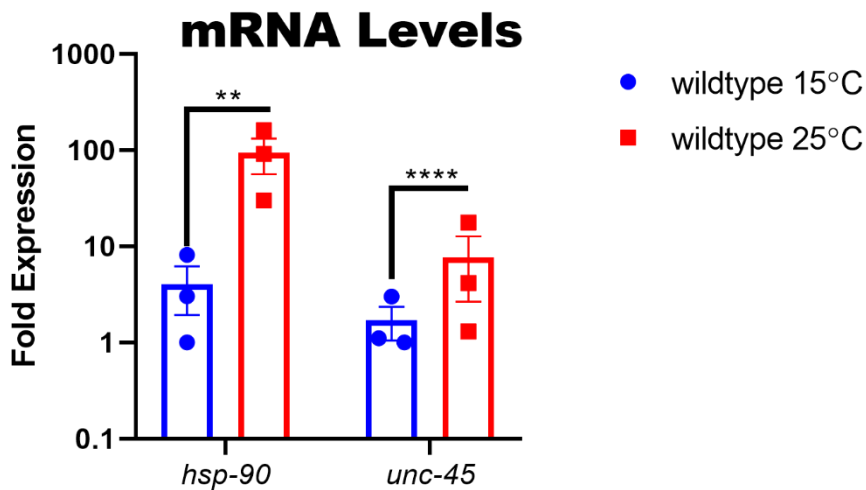

**Figure S7. Steady state transcript expression of *hsp-90* and *unc-45* in Wildtype worms grown at 15°C and 25°C.**
